# Supplementary material for: Novel PANK2 Mutations in Patients With Pantothenate Kinase-Associated Neurodegeneration and the Genotype–Phenotype Correlation
Source: Front Aging Neurosci. 2022 Apr 6;14:848919. doi: 10.3389/fnagi.2022.848919 (PMC9019683; doi:10.3389/fnagi.2022.848919)
Supplement: Supplementary Table 2 — Pathogenic prediction of 6 missense mutations of PANK2 by 23 in silico predictive algorithms. [file Table_2.XLSX]

## Sheet: Sheet1
Mutation	gnomAD	Supporting deleterious algorithm	D:A algorithms	Damaging score	SIFT_score	SIFT_pred	Polyphen2_HDIV_score	Polyphen2_HDIV_pred	Polyphen2_HVAR_score	Polyphen2_HVAR_pred	LRT_score	LRT_pred	MutationTaster_score	MutationTaster_pred	MutationAssessor_score	MutationAssessor_pred	FATHMM_score	FATHMM_pred	PROVEAN_score	PROVEAN_pred	VEST3_score	VEST3_pred	MetaSVM_score	MetaSVM_pred	MetaLR_score	MetaLR_pred	M_CAP_score	M_CAP_pred	CADD_score	CADD_pred	DANN_score	DANN_pred	FATHMM_MKL_score	FATHMM_MKL_pred	Eigen_score	Eigen_pred	GenoCanyon_score	GenoCanyon_pred	fitCons_score	fitCons_pred	GERP_score	GERP_pred	phyloP_score	phyloP_pred	phastCons_score	phastCons_pred	SiPhy_score	SiPhy_pred	ReVe_score
c.1355A>G/p. D452G	8.122e-06	22	22:23	0.96	0.001	Damaging	1	Probably_damaging	0.996	Probably_damaging	0	Deleterious	1	Disease_causing	3.965	High	-6.67	Damaging	-6.27	Damaging	0.879	Damaging	0.967	Damaging	0.992	Damaging	0.82	Damaging	25.4	Damaging	0.998	Damaging	0.977	Damaging	0.666	Damaging	1	Damaging	0.672	Tolerable	4.93	Conserved	9.238	Conserved	1	Conserved	12.585	Conserved	0.962
c.1499A>T/p. N500I	4.061e-06	22	22:23	0.96	0	Damaging	1	Probably_damaging	1	Probably_damaging	0	Deleterious	1	Disease_causing	3.885	High	-6.38	Damaging	-8.49	Damaging	0.717	Damaging	0.984	Damaging	0.991	Damaging	0.84	Damaging	31	Damaging	0.993	Damaging	0.995	Damaging	0.891	Damaging	1	Damaging	0.672	Tolerable	5.21	Conserved	9.238	Conserved	1	Conserved	13.086	Conserved	0.901
c.970G>T/p. D324Y	-	19	19:23	0.83	0.044	Damaging	0.723	Possibly_damaging	0.357	Benign	0	Deleterious	1	Disease_causing	2.16	Medium	-4.87	Damaging	-6.7	Damaging	0.899	Damaging	0.92	Damaging	0.895	Damaging	0.303	Damaging	18.2	Tolerable	0.993	Damaging	0.965	Damaging	0.584	Damaging	1	Damaging	0.707	Damaging	4.4	Conserved	8.082	Conserved	1	Conserved	12.328	Conserved	0.971
c.1103A>G/p. D368G*	-	19	19:23	0.83	0.071	Tolerable	0.872	Possibly_damaging	0.674	Possibly_damaging	0	Deleterious	1	Disease_causing	2.055	Medium	-6.28	Damaging	-3.69	Damaging	0.61	Damaging	1.078	Damaging	0.972	Damaging	0.537	Damaging	24.5	Damaging	0.997	Damaging	0.983	Damaging	0.584	Damaging	1	Damaging	0.722	Damaging	4.64	Conserved	9.238	Conserved	1	Conserved	12.046	Conserved	0.837
c.1696C>G/p. L566V*	-	15	15:23	0.65	0.02	Damaging	0.759	Possibly_damaging	0.391	Benign	0.002	Neutral	0.979	Disease_causing	2.655	Medium	-4.41	Damaging	-1.57	Tolerable	0.397	Tolerable	0.977	Damaging	0.944	Damaging	0.367	Damaging	25.4	Damaging	0.998	Damaging	0.964	Damaging	0.243	Damaging	1	Damaging	0.672	Tolerable	3.04	Conserved	2.748	Conserved	1	Conserved	8.283	Nonconserved	0.701
c.1133A>G/p. D378G	0.0002	14	14:23	0.61	0.165	Tolerable	0.025	Benign	0.058	Benign	0	Deleterious	0.504	Polymorphism	1.86	Low	-6.11	Damaging	-3.84	Damaging	0.682	Damaging	1.313	Damaging	0.948	Damaging	0.311	Damaging	23.2	Damaging	0.988	Tolerable	0.813	Damaging	-0.02	Tolerable	1	Damaging	0.722	Damaging	4.48	Conserved	2.091	Conserved	0.97	Nonconserved	11.754	Nonconserved	0.847
[truncated: 67 more columns]
