# Supplementary material for: Novel PANK2 Mutations in Patients With Pantothenate Kinase-Associated Neurodegeneration and the Genotype–Phenotype Correlation
Source: Front Aging Neurosci. 2022 Apr 6;14:848919. doi: 10.3389/fnagi.2022.848919 (PMC9019683; doi:10.3389/fnagi.2022.848919)
Supplement: Supplementary Table 4 — General information regarding 255 patients with PKAN. [file Table_4.XLSX]

## Sheet: Sheet1
Supplementary Table 4. General information of 255 PKAN patients
Patient ID	Sex	Age at onset (yrs)	Loss of gait (yrs)	Clinic Symptoms													Mutation (Paternal/Maternal origin)		Located domains	Region/Country	Reference
				Gait disturbance	Dystonia(Limbs/Oromandibular/Generalized)	Cognitive decline	Tremor	Dystonic opisthotonus	Dysarthria	Dysphagia	Pyramidal sign	Consanguineous marriage	MRI	Mental impairment	Retinal degeneration	Parkinsonism	Gene (P/M)	Protein
Homozygous missense (85)
PKAN001	F	6	/	/	+	/	/	/	/	+	/	/	+	-	+	/	c.67C>A	p.L23I	TPM	China	Chang XT.2020
																	c.67C>A	p.L23I	TPM
PKAN002	M	6	/	/	+	/	/	/	+	-	-	/	+	+	+	+	c.71A>G	p.H24R	TPM	Greece	Bozi M.2009
																	c.71A>G	p.H24R	TPM
PKAN003	M	6	/	/	+	/	/	/	+	-	-	/	+	+	+	/	c.71A>G	p.H24R	TPM	China	Chang XT.2020
																	c.71A>G	p.H24R	TPM
PKAN004	M	8	/	/	+	/	/	/	-	-	-	/	+	-	-	/	c.97C>G	p.R33G	TPM	China	Chang XT.2020
																	c.97C>G	p.R33G	TPM
PKAN005	F	2	/	/	+	/	/	/	-	-	+	/	+	-	-	/	c.383G>A	p.R128Q	R/I	China	He J.2013
																	c.383G>A	p.R128Q	R/I
PKAN006	F	11	/	/	+	/	/	/	+	/	+	/	+	-	/	/	c.391G>A	p.A131T	R/I	China	He J.2013
																	c.391G>A	p.A131T	R/I
PKAN007	F	1	6	/	+	/	/	/	+	/	+	/	-	/	-	/	c.790C>T	p.R264W	CCR	China	He J.2013
																	c.790C>T	p.R264W	CCR
PKAN008	M	12	/	+	+	+	-	/	+	+	+	/	+	-	-	/	c.856C>T	p.R286C	CCR	Italy	Pellecchia MT.2005
																	c.856C>T	p.R286C	CCR
PKAN009	F	12	/	+	+	-	-	/	+	-	+	/	+	-	-	/	c.856C>T	p.R286C	CCR	Italy	Pellecchia MT.2005
																	c.856C>T	p.R286C	CCR
PKAN010	M	5	/	-	+	+	+	/	+	-	+	/	+	-	-	/	c.856C>T	p.R286C	CCR	Italy	Pellecchia MT.2005
																	c.856C>T	p.R286C	CCR
PKAN011	M	10	/	/	+	/	/	/	+	/	+	/	+	+	-	/	c.856C>T	p.R286C	CCR	Italy	Pellecchia MT.2005
																	c.856C>T	p.R286C	CCR
PKAN012	F	5	13	+	+	/	/	/	/	/	+	/	+	-	+	-	c.649G>A	p.D217N	CCR	/	Hartig MB.2006
																	c.649G>A	p.D217N	CCR
PKAN013	M	5	/	/	+	/	/	/	-	/	-	+	+	+	/	+	c.655G>A	p.G219S	CCR	Turkey	Akcakaya NH.2017
																	c.655G>A	p.G219S	CCR
PKAN014	F	4	/	/	+	/	/	/	-	/	-	+	+	+	/	+	c.655G>A	p.G219S	CCR	Turkey	Akcakaya NH.2017
																	c.655G>A	p.G219S	CCR
PKAN015	M	8	/	/	-	/	/	/	-	/	-	+	+	-	/	+	c.655G>A	p.G219S	CCR	Turkey	Akcakaya NH.2017
																	c.655G>A	p.G219S	CCR
PKAN016	F	5	/	/	-	/	/	/	-	/	-	+	+	+	/	-	c.655G>A	p.G219S	CCR	Turkey	Akcakaya NH.2017
																	c.655G>A	p.G219S	CCR
PKAN017	F	5	Died at 9.0	-	+	+	/	+	+	/	/	/	+	+	+	-	c.656G>T	p.G219V	CCR	Mexican	Briceño HM.2015
																	c.656G>T	p.G219V	CCR
PKAN018	M	4	Died at 6.0	-	+	+	/	+	+	/	/	/	+	+	-	-	c.656G>T	p.G219V	CCR	Mexican	Briceño HM.2015
																	c.656G>T	p.G219V	CCR
PKAN019	F	7	/	-	+	+	/	+	+	/	/	/	+	+	-	-	c.656G>T	p.G219V	CCR	Mexican	Briceño HM.2015
																	c.656G>T	p.G219V	CCR
PKAN020	M	21	/	/	+	/	/	/	-	-	-	/	+	-	-	/	c.1003A>G	p.K335E	CCR	/	Chung SJ.2008
																/	c.1003A>G	p.K335E	CCR
PKAN021	F	12	18	/	+	/	/	+	-	/	+	+	+	/	/	+	c.676G>A	p.V226I	CCR	Turkey	Akcakaya NH.2017
																	c.676G>A	p.V226I	CCR
PKAN022	F	16	/	/	-	/	/	/	+	/	-	+	+	+	/	+	c.676G>A	p.V226I	CCR	Turkey	Akcakaya NH.2017
																	c.676G>A	p.V226I	CCR
PKAN023	F	12	/	/	-	/	/	/	-	/	-	+	+	+	/	-	c.676G>A	p.V226I	CCR	Turkey	Akcakaya NH.2017
																	c.676G>A	p.V226I	CCR
PKAN024	M	11	12	+	+	+	/	/	/	/	/	/	+	/	-	-	c.680A>G	p.Y227C	CCR	Pakistani	Saleheen D.2007
																	c.680A>G	p.Y227C	CCR
PKAN025	M	13	13	+	+	+	/	/	+	/	/	-	+	/	-	-	c.680A>G	p.Y227C	CCR	Pakistani	Saleheen D.2007
																	c.680A>G	p.Y227C	CCR
PKAN026	M	4	4	+	+	+	/	/	/	/	/	-	+	/	+	-	c.683T>C	p.F228S	CCR	/	Chiapparini L.2011
																	c.683T>C	p.F228S	CCR
PKAN027	M	22	33	+	/	/	/	/	+	+	/	+	+	/	-	/	c.695A>G	p.D232G	CCR	Cypriot	Tanteles GA.2014
																	c.695A>G	p.D232G	CCR
PKAN028	F	11	/	/	+	/	/	/	+	+	-	/	+	-	/	/	c.721G>A	p.E241K	CCR	China	Zhou J.2017
																	c.721G>A	p.E241K	CCR
PKAN029	M	16	/	+	+	+	-	/	+	-	+	/	+	+	+	/	c.740G>C	p.S247T	CCR	Portugal	Pellecchia MT.2005
																	c.740G>C	p.S247T	CCR
PKAN030	M	17	29	+	+	-	+	/	+	+	+	/	+	+	-	/	c.740G>C	p.S247T	CCR	France	Pellecchia MT.2005
																	c.740G>C	p.S247T	CCR
PKAN031	F	18	/	/	+	/	+	/	-	-	-	/	+	-	-	+	c.764A>G	p.N255S	CCR	Japan	Yamashita S.2004
																	c.764A>G	p.N255S	CCR
PKAN032	M	10	18	/	+	/	/	/	/	/	+	/	+	+	+	+	c.790C>T	p.R264W	CCR	/	Hartig MB.2006
																	c.790C>T	p.R264W	CCR
PKAN033	F	15	/	/	-	/	/	/	-	/	-	+	+	/	/	-	c.800A>C	p.H267P	CCR	Turkey	Akcakaya NH.2017
																	c.800A>C	p.H267P	CCR
PKAN034	M	1	4	/	+	-	/	/	-	/	+	+	/	/	/	/	c.809T>C	p.L270P	CCR	Thailand	Sakpichaisakul K.2019
																	c.809T>C	p.L270P	CCR
PKAN035	F	15	23	/	+	/	/	+	+	/	-	-	+	/	/	+	c.833G>T	p.R278L	CCR	Turkey	Akcakaya NH.2017
																	c.833G>T	p.R278L	CCR
PKAN036	M	24	/	/	+	/	/	/	+	-	-	/	+	-	/	+	c.833G>T	p.R278L	CCR	/	Hartig MB.2006
																	c.833G>T	p.R278L	CCR
PKAN037	M	11	/	+	+	/	-	/	+	-	/	/	/	-	-	+	c.841A>T	p.N281Y	CCR	/	Hartig MB.2006
																	c.841A>T	p.N281Y	CCR
PKAN038	M	18	>23.0	/	+	/	/	/	/	/	+	/	+	-	-	-	c.856C>T	p.R286C	CCR	/	Hartig MB.2006
																	c.856C>T	p.R286C	CCR
PKAN039	M	19	>20.0	+	+	/	/	/	/	/	+	/	+	-	-	-	c.856C>T	p.R286C	CCR	/	Hartig MB.2006
																	c.856C>T	p.R286C	CCR
PKAN040	F	12	20	+	+	-	/	/	+	/	-	+	+	-	/	/	c.863C>T	p.P288L	CCR	China	Li YF.2016
																	c.863C>T	p.P288L	CCR
PKAN041	M	8	/	+	/	+	/	+	+	/	/	/	/	+	/	/	c.970G>T	p.D324Y	CCR	China	This study
																	c.970G>T	p.D324Y	CCR
PKAN042	M	21	/	-	+	/	-	/	-	-	/	-	+	-	-	/	c.1003A>G	p.K335E	CCR	/	Santos E.2007
																	c.1003A>G	p.K335E	CCR
PKAN043	M	12	/	/	+	/	/	/	+	/	/	/	+	/	-	/	c.1010A>C	p.D337G	CCR	India	Aggarwal A.2010
																	c.1010A>C	p.D337G	CCR
PKAN044	F	13	/	/	+	/	/	/	+	/	/	/	+	/	/	/	c.1010A>C	p.D337G	CCR	India	Aggarwal A.2010
																	c.1010A>C	p.D337G	CCR
PKAN045	M	28	/	+	-	+	+	/	+	+	-	+	+	-	/	+	c.1037T>G	p.I346S	CCR	Japanese	Doi H.2010
																	c.1037T>G	p.I346S	CCR
PKAN046	F	35	/	+	+	+	-	/	-	-	+	+	+	-	/	/	c.1037T>G	p.I346S	CCR	Japanese	Doi H.2010
																	c.1037T>G	p.I346S	CCR
PKAN047	F	2	25	+	+	-	/	/	+	+	+	+	+	/	/	/	c.1069C>T	p.R357W	CCR	India	Angural A.2017
																	c.1069C>T	p.R357W	CCR
PKAN048	M	2	/	+	+	+	/	/	+	/	/	+	+	/	/	/	c.1069C>T	p.R357W	CCR	India	Angural A.2017
																	c.1069C>T	p.R357W	CCR
PKAN049	F	14	>17.0	/	+	/	/	/	/	/	-	/	+	+	-	+	c.1069C>T	p.R357W	CCR	/	Hartig MB.2006
																	c.1069C>T	p.R357W	CCR
PKAN050	F	20	/	+	/	/	+	/	/	/	/	/	/	+	/	/	c.1103A>G	p.D368G	CCR	China	This study
																	c.1103A>G	p.D368G	CCR
PKAN051	F	12	/	/	+	/	+	/	+	-	-	/	+	-	-	-	c.1208A>T	p.D403V	CCR	/	Rohani M.2017
																	c.1208A>T	p.D403V	CCR
PKAN052	F	48	/	/	+	/	/	/	+	+	/	/	+	-	/	+	c.1211A>T	p.N404I	CCR	/	Diaz N.2013
																	c.1211A>T	p.N404I	CCR
PKAN053	M	30	/	/	+	/	/	/	+	-	/	/	+	-	/	+	c.1211A>T	p.N404I	CCR	Brazil	Camargos ST.2011
																	c.1211A>T	p.N404I	CCR
PKAN054	F	16	/	/	+	/	+	/	-	/	/	/	+	-	/	+	c.1211A>T	p.N404I	CCR	Brazil	Camargos ST.2011
																	c.1211A>T	p.N404I	CCR
PKAN055	M	26	/	/	+	/	/	/	+	-	+	/	+	-	/	+	c.1211A>T	p.N404I	CCR	Brazil	Camargos ST.2011
																	c.1211A>T	p.N404I	CCR
PKAN056	M	26	/	+	+	+	/	+	+	/	/	/	+	+	-	+	c.1211A>T	p.N404I	CCR	Mexican	Briceño HM.2015
																	c.1211A>T	p.N404I	CCR
PKAN057	F	3	/	+	+	+	/	/	+	/	/	/	+	+	-	+	c.1211A>T	p.N404I	CCR	Mexican	Briceño HM.2015
																	c.1211A>T	p.N404I	CCR
PKAN058	M	25	/	+	+	+	/	/	+	/	/	/	+	+	-	+	c.1211A>T	p.N404I	CCR	Mexican	Briceño HM.2015
																	c.1211A>T	p.N404I	CCR
PKAN059	M	8	/	+	+	+	/	/	+	/	/	/	+	+	-	+	c.1211A>T	p.N404I	CCR	Mexican	Briceño HM.2015
																	c.1211A>T	p.N404I	CCR
PKAN060	M	18	/	+	+	+	/	/	+	/	/	/	+	+	-	+	c.1211A>T	p.N404I	CCR	Mexican	Briceño HM.2015
																	c.1211A>T	p.N404I	CCR
PKAN061	F	18	/	-	+	+	/	/	+	/	/	/	+	+	-	+	c.1211A>T	p.N404I	CCR	Mexican	Briceño HM.2015
																	c.1211A>T	p.N404I	CCR
PKAN062	M	14	/	+	+	+	/	/	+	/	/	-	+	+	+	/	c.1217A>T	p.K406I	CCR	/	Israni AV.2017
																	c.1217A>T	p.K406I	CCR
PKAN063	F	9	9	+	+	+	-	/	+	+	+	/	+	-	-	/	c.1561G>A	p.G521R	CCR	Portugal	Pellecchia MT.2005
																	c.1561G>A	p.G521R	CCR
PKAN064	M	6	/	/	+	/	/	/	/	+	+	/	/	/	+	+	c.1561G>A	p.G521R	CCR	/	Kruer MC.2011
																	c.1561G>A	p.G521R	CCR
PKAN065	M	0.67	/	/	+	/	/	/	+	-	/	/	/	-	+	-	c.1561G>A	p.G521R	CCR	/	Thomas M.2002
																	c.1561G>A	p.G521R	CCR
PKAN066	M	9	16	/	+	/	/	/	+	/	-	/	-	-	/	/	c.1572G>C	p.L524F	CCR	China	He J.2013
																	c.1572G>C	p.L524F	CCR
PKAN067	M	4	7	+	+	/	/	/	+	/	+	/	+	+	+	+	c.1274T>C	p.L425P	CCR	/	Hartig MB.2006
																	c.1274T>C	p.L425P	CCR
PKAN068	M	4	7	+	+	/	/	/	+	/	+	/	+	+	+	+	c.1274T>C	p.L425P	CCR	/	Hartig MB.2006
																	c.1274T>C	p.L425P	CCR
PKAN069	F	2	7	/	+	/	/	/	+	+	+	/	-	-	-	/	c.1325A>G	p.D442G	CCR	China	Zhou J.2017
																	c.1325A>G	p.D442G	CCR
PKAN070	M	22	/	+	/	+	/	/	+	/	/	/	+	+	/	/	c.1355A>G	p.D452G	CCR	China	This study
																	c.1355A>G	p.D452G	CCR
PKAN071	M	37	/	/	+	/	+	/	-	/	/	/	-	/	/	/	c.1709C>T	p.P570L	CCR	India	Aggarwal A.2010
																	c.1709C>T	p.P570L	CCR
PKAN072	F	2.5	8	+	+	/	+	/	+	/	/	-	+	/	/	/	c.1391C>T	p.P464L	CCR	China	Chan KY.2008
																	c.1391C>T	p.P464L	CCR
PKAN073	M	10	22	+	+	+	/	/	+	/	/	-	+	/	/	/	c.1391C>T	p.P464L	CCR	China	Chan KY.2008
																	c.1391C>T	p.P464L	CCR
PKAN074	F	1	7	/	+	/	/	/	+	/	+	+	+	/	/	-	c.1481T>G	p.L494W	CCR	Turkey	Akcakaya NH.2017
																	c.1481T>G	p.L494W	CCR
PKAN075	M	4	8	+	+	/	/	/	/	/	+	/	+	+	-	-	c.1499A>T	p.N500I	CCR	/	Hartig MB.2006
																	c.1499A>T	p.N500I	CCR
PKAN076	M	2	6	/	+	/	/	/	+	+	-	/	+	-	-	/	c.1502T>C	p.I501T	CCR	China	Zhou J.2017
																	c.1502T>C	p.I501T	CCR
PKAN077	F	1.5	14	+	+	/	+	/	+	+	/	-	+	/	+	/	c.1514C>A	p.A505E	CCR	/	Matarin MM.2006
																	c.1514C>A	p.A505E	CCR
PKAN078	F	2	/	/	+	/	/	/	+	-	+	/	-	-	/	/	c.1555T>C	p.F519L	CCR	China	Zhou J.2017
																	c.1555T>C	p.F519L	CCR
PKAN079	M	3	6	+	+	/	/	/	+	/	+	/	+	+	+	+	c.1561G>A	p.G521R	CCR	/	Hartig MB.2006
																	c.1561G>A	p.G521R	CCR
PKAN080	M	17	19	/	+	/	/	/	+	/	-	/	+	+	-	-	c.1583C>T	p.T528M	CCR	/	Hartig MB.2006
																	c.1583C>T	p.T528M	CCR
PKAN081	F	20	26	+	+	/	/	/	+	/	+	/	+	+	+	-	c.1583C>T	p.T528M	CCR	/	Hartig MB.2006
																	c.1583C>T	p.T528M	CCR
PKAN082	F	25	>30.0	/	+	/	/	/	+	/	+	/	+	+	+	-	c.1583C>T	p.T528M	CCR	/	Hartig MB.2006
																	c.1583C>T	p.T528M	CCR
PKAN083	M	8	12	/	+	/	/	/	+	/	-	+	+	/	/	-	c.1660G>A	p.E554K	CCR	Turkey	Akcakaya NH.2017
																	c.1660G>A	p.E554K	CCR
PKAN084	M	8	11	/	+	/	/	/	+	/	-	+	+	/	/	-	c.1660G>A	p.E554K	CCR	Turkey	Akcakaya NH.2017
																	c.1660G>A	p.E554K	CCR
PKAN085	F	7	/	/	+	/	/	/	+	/	-	+	+	/	/	-	c.1660G>A	p.E554K	CCR	Turkey	Akcakaya NH.2017
																	c.1660G>A	p.E554K	CCR
Compound hetrozygous missenses (62)
PKAN086	F	28	/	/	+	/	/	/	+	-	/	/	/	+	-	+	c.370A>G	p.M124V	R/I	/	Thomas M.2002
																	c.1561G>A	p.G521R	CCR
PKAN087	M	13	/	+	+	-	-	-	+	/	/	/	+	/	/	/	c.398T>A	p.M133K	R/I	China	Ma LY. 2015
																	c.970G>T	p.D324Y	CCR
PKAN088	F	7	16	/	+	/	/	/	+	+	+	/	/	/	+	/	c.457A>T	p.T153S	R/I	Algerian	Assami S.2011
																	c.519C>G	p.P173P	R/I
PKAN089	M	6	11	/	+	/	/	/	+	-	+	/	/	/	+	/	c.457A>T	p.T153S	R/I	Algerian	Assami S.2011
																	c.519C>G	p.P173P	R/I
PKAN090	F	7	14	/	+	/	/	/	+	+	+	/	+	+	+	/	c.457A>T	p.T153S	R/I	Algerian	Assami S.2011
																	c.519C>G	p.P173P	R/I
PKAN091	M	11	/	+	+	/	/	/	+	-	+	/	+	+	-	/	c.790C>T	p.R264W	CCR	Italy	Pellecchia MT.2005
																	c.965A>G	p.E322G	CCR
PKAN092	F	3	/	+	+	+	/	/	+	/	/	/	+	/	/	/	c.640G>T	p.A214S	CCR	China	He J.2013
																	c.1172G>A	p.G391D	CCR
PKAN093	M	2	14	/	+	/	/	/	+	+	+	/	-	-	+	/	c.644G>A	p.G215E	CCR	China	Zhou J.2017
																	c.856C>T	p.R286C	CCR
PKAN094	M	6	7.5	+	+	+	/	/	+	+	+	-	+	/	/	/	c.650A>G	p.D217G	CCR	China	Shi XL.2017
																	c.1341T>G	p.D447E	CCR
PKAN095	F	2	19	+	+	/	/	/	/	/	+	/	+	+	+	-	c.683T>C	p.F228S	CCR	/	Hartig MB.2006
																	c.1648T>C	p.F550L	CCR
PKAN096	F	8	10	/	+	/	/	/	/	/	-	/	+	/	/	/	c.1021T>G	p.C341G	CCR	China	He J.2013
																	c.1355A>G	p.D452G	CCR
PKAN097	F	6	10	+	+	+	-	/	+	+	-	/	+	+	-	/	c.740G>C	p.S247T	CCR	Portugal	Pellecchia MT.2005
																	c.1561G>A	p.G521R	CCR
PKAN098	M	10	/	+	+	-	-	+	+	/	/	/	+	/	/	/	c.745C>T	p.R249W	CCR	China	Ma LY. 2015
																	c.970G>T	p.D324Y	CCR
																	c.1133A>G	p.D378G	CCR
PKAN099	M	9	/	/	+	/	/	/	+	+	+	/	-	-	/	/	c.784G>A	p.G262S	CCR	China	Zhou J.2017
																	c.1572G>C	p.L524F	CCR
PKAN100	F	17	>23.0	+	+	/	/	/	+	/	+	/	+	-	/	-	c.790C>T	p.R264W	CCR	/	Hartig MB.2006
																	c.856C>T	p.R286C	CCR
PKAN101	M	10	>27.0	/	+	/	/	/	+	/	+	/	+	+	-	+	c.790C>T	p.R264W	CCR	/	Hartig MB.2006
																	c.965A>G	p.E322G	CCR
PKAN102	M	4	19	+	+	/	/	/	/	/	+	/	+	+	+	+	c.790C>T	p.R264W	CCR	/	Hartig MB.2006
																	c.1412G>A	p.S471N	CCR
PKAN103	M	17	/	/	-	/	/	/	+	-	-	/	+	-	/	+	c.1133A>G	p.D378G	CCR	China	Zhang YH.2005
																	c.1172G>A	p.G391D	CCR
PKAN104	M	7	/	/	+	/	/	/	+	+	-	/	+	-	-	/	c.833G>A	p.R278H	CCR	China	He J.2013
																	c.1502T>A	p.I501N	CCR
PKAN105		9.4	10.9	+	+	/	/	/	/	/	/	/	+	/	/	/	c.852T>G	p.F284L	CCR	Korea	Lim BC.2011
																	c.1319G>C	p.R440P	CCR
PKAN106	F	7	/	/	+	/	/	/	-	-	-	/	+	-	-	/	c.856C>T	p.R286C	CCR	China	Chang XT.2020
																	c.1502T>A	p.I501N	CCR
PKAN107	M	6	16	/	+	/	/	/	/	/	+	/	+	+	+	-	c.856C>T	p.R286C	CCR	/	Hartig MB.2006
																	c.1561G>A	p.G521R	CCR
PKAN108	F	7	15	+	+	/	/	/	/	/	+	/	+	+	+	-	c.856C>T	p.R286C	CCR	/	Hartig MB.2006
																	c.1561G>A	p.G521R	CCR
PKAN109	F	16	12	/	/	/	+	/	+	-	-	-	+	-	-	-	c.949G>A	p.G317R	CCR	Mexican	Huerta, et al. 2021
																	c.1688T>C	p.L563P	CCR
PKAN110	M	8	21	+	+	/	/	/	/	/	+	/	+	+	+	-	c.965A>G	p.E322G	CCR	/	Hartig MB.2006
																	c.1238T>C	p.L413P	CCR
PKAN111	M	11	>26.0	/	+	/	/	/	/	/	+	/	+	+	+	-	c.965A>G	p.E322G	CCR	/	Hartig MB.2006
																	c.1238T>C	p.L413P	CCR
PKAN112	M	13	>37.0	+	+	/	/	/	/	/	+	/	+	+	+	+	c.965A>G	p.E322G	CCR	/	Hartig MB.2006
																	c.1238T>C	p.L413P	CCR
PKAN113	M	30	/	-	-	-	+	-	+	/	/	/	+	/	/	/	c.970G>T	p.D324Y	CCR	China	Ma LY. 2015
																	c.1133A>G	p.D378G	CCR
PKAN114	F	3	13	/	+	/	/	/	+	-	-	/	+	-	/	/	c.970G>T	p.D324Y	CCR	China	Zhou J.2017
																	c.1502T>C	p.I501T	CCR
PKAN115	F	3	/	/	+	/	/	/	+	+	-	/	-	-	/	/	c.1021T>G	p.C341G	CCR	China	Zhou J.2017
																	c.1355A>G	p.D452G	CCR
PKAN116	M	5	12	/	+	/	/	/	+	-	-	/	+	+	/	/	c.1021T>G	p.C341G	CCR	China	Zhou J.2017
																	c.1687C>G	p.L563V	CCR
PKAN117	M	36	/	+	/	+	+	/	+	-	-	/	+	/	-	/	c.1022G>C	p.C341S	CCR	/	Vasconcelos OM.2003
																	c.1082A>G	p.Y361C	CCR
PKAN118	M	35	/	/	+	/	/	/	-	-	/	/	+	-	-	/	c.1133A>G	p.D378G	CCR	Korea	Kim SH.2009
																	c.1319G>C	p.R440P	CCR
PKAN119	M	22	/	+	+	-	-	-	+	/	/	/	+	/	/	/	c.1133A>G	p.D378G	CCR	China	Ma LY. 2015
																	c.1499A>T	p.N500I	CCR
PKAN120	M	17	/	/	+	-	+	/	+	+	/	-	+	/	/	/	c.1133A>G	p.D378G	CCR	China	Zhang YH.2005
																	c.1502T>A	p.I501N	CCR
PKAN121	M	46	/	+	+	/	+	/	+	/	/	/	+	/	/	/	c.1133A>G	p.D378G	CCR	China(TaiWan)	Gardner RC.2009
																	c.1355A>G	p.D452G	CCR
PKAN122	M	51	/	+	+	/	/	/	+	/	/	/	+	/	/	+	c.1133A>G	p.D378G	CCR	China(TaiWan)	Gardner RC.2009
																	c.1355A>G	p.D452G	CCR
Patien123	M	16	/	+	/	/	/	+	/	+	/	/	/	+	/	/	c.1133A>G	p.D378G	CCR	China	This study
																	c.1499A>T	p.N500I	CCR
Patien124	F	8	13	/	+	/	/	/	/	/	-	/	-	/	/	/	c.1139C>T	p.A380V	CCR	China	He J.2013
																	c.1172G>C	p.G391A	CCR
Patien125	M	10	/	-	+	+	/	+	+	/	/	/	+	-	-	-	c.1211A>T	p.N404I	CCR	Mexican	Briceño HM.2015
																	c.1405G>C	p.A469P	CCR
Patien126	F	16	/	-	+	-	/	/	+	/	/	/	+	-	-	-	c.1211A>T	p.N404I	CCR	Mexican	Briceño HM.2015
																	c.1405G>C	p.A469P	CCR
PKAN127	F	10	10	+	+	-	-	/	+	+	-	/	+	-	-	/	c.1561G>A	p.G521R	CCR	Portugal	Pellecchia MT.2005
																	c.1583C>T	p.T528M	CCR
PKAN128	M	14	/	+	+	-	-	/	+	-	+	/	+	-	-	/	c.1561G>A	p.G521R	CCR	France	Pellecchia MT.2005
																	c.1583C>T	p.T528M	CCR
PKAN129	F	8	9	+	+	/	/	/	/	/	+	/	+	+	+	+	c.1274T>C	p.L425P	CCR	/	Hartig MB.2006
																	c.1283G>A	p.C428Y	CCR
PKAN130		8.4	/	+	+	/	/	/	/	/	/	/	+	/	/	/	c.1301C>T	p.A434V	CCR	Korea	Lim BC.2011
																	c.1319G>C	p.R440P	CCR
PKAN131		2.3	/	+	+	/	/	/	/	/	/	/	+	/	/	/	c.1319G>C	p.R440P	CCR	Korea	Lim BC.2011
																	c.1502T>A	p.N501I	CCR
PKAN132		3.8	4	+	+	/	/	/	/	/	/	/	+	/	/	/	c.1319G>C	p.R440P	CCR	Korea	Lim BC.2011
																	c.1502T>A	p.N501I	CCR
PKAN133		8.5	11	/	+	/	/	/	/	/	/	/	+	/	/	/	c.1319G>C	p.R440P	CCR	Korea	Lim BC.2011
																	c.1502T>A	p.N501I	CCR
PKAN134	F	2	11	/	+	/	/	/	-	-	-	/	+	-	+	/	c.1319G>C	p.R440P	CCR	China	Zhou J.2017
																	c.1630G>T	p.G544W	CCR
PKAN135	F	12	/	+	/	+	/	/	/	+	/	/	/	+	/	/	c.1355A>G	p.D452G	CCR	China	This study
																	c.1696C>G	p.L566V	CCR
PKAN136	M	24	/	+	+	-	-	+	+	/	/	/	+	/	/	/	c.1411A>G	p.S471G	CCR	China	Ma LY. 2015
																	c.1510A>G	p.I504V	CCR
PKAN137	M	22	/	/	+	-	/	/	+	/	/	-	+	-	-	+	c.1424T>C	p.M475T	CCR	Greek	Paraskevas CP.2017
																	c.1583C>T	p.T528M	CCR
PKAN138	F	6	>60.0	+	+	/	/	/	/	/	/	/	+	+	/	-	c.1442G>A	p.R481Q	CCR	/	Hartig MB.2006
																	c.1561G>A	p.G521R	CCR
PKAN139	M	16	24	/	+	/	/	/	-	/	+	-	+	/	/	-	c.1466T>C	p.L489P	CCR	Turkey	Akcakaya NH.2017
																	c.1583C>T	p.T528M	CCR
PKAN140	F	8	13	/	+	/	/	/	+	+	+	/	-	-	/	/	c.1469C>T	p.A490V	CCR	China	Zhou J.2017
																	c.1502T>C	p.I501T	CCR
PKAN141	F	6	/	/	+	/	/	/	+	+	-	/	+	-	/	/	c.1469C>G	p.A490G	CCR	China	Zhou J.2017
																	c.1555T>C	p.F519L	CCR
PKAN142	M	11.5	/	+	+	/	-	/	/	/	/	/	+	/	-	/	c.1555T>C	p.F519L	CCR	China	Pan LS.2013
																	c.1607A>G	p.Y536C	CCR
PKAN143	M	11.5	/	/	+	/	/	/	-	/	-	/	+	-	-	/	c.1555T>C	p.F519L	CCR	China	Pan LS.2013
																	c.1607A>G	p.Y536C	CCR
PKAN144	M	14	19	/	+	/	/	/	+	/	-	/	+	+	-	-	c.1561G>A	p.G521R	CCR	/	Hartig MB.2006
																	c.1583C>T	p.T528M	CCR
PKAN145	M	4	/	+	+	-	/	/	+	+	/	-	+	/	+	/	c.1561G>A	p.G521R	CCR	Mexican	Pérez-González EA.2013
																	c.1663G>A	p.G555S	CCR
PKAN146	M	25	/	/	+	/	+	/	+	-	+	/	+	-	-	/	c.1561G>A	p.G521R	CCR	/	Liang TW.2006
																	c.1585A>G	p.I529V	CCR
PKAN147	M	16	22	/	+	/	/	/	+	+	/	/	+	/	/	/	c.1583C>T	p.T528M	CCR	/	Yapici ZH.2016
																	c.1466T>C	p.L489P	CCR
Homozygous indel/frameshift (28)
PKAN148	M	4	/	/	+	/	/	/	/	/	-	/	-	/	/	/	c.145DelC	p.R49fsX94	R/I	China	He J.2013
																	c.145DelC	p.R49fsX94	R/I
PKAN149	F	4	/	/	+	/	/	/	+	+	-	/	-	-	/	/	c.475DelC	p.R159fsX94	R/I	China	Zhou J.2017
																	c.475DelC	p.R159fsX94	R/I
PKAN150	M	1	9	+	+	+	-	/	+	+	+	/	+	-	-	/	c.493_494del	fs180X	R/I	France	Pellecchia MT.2005
																	c.493_494del	fs180X	R/I
PKAN151	F	10	/	/	+	/	/	/	/	/	-	/	-	+	-	/	IVS c.540-13_540-12insTTCCCC	Truncated	R/I	/	Han JN.2016
																	IVS c.540-13_540-12insTTCCCC	Truncated	R/I
PKAN152	M	6	9	+	+	/	/	/	/	/	+	/	+	+	+	+	c.573delC	p.S191RfsX13	R/I	/	Hartig MB.2006
																	c.573delC	p.S191RfsX13	R/I
PKAN153	F	3	11	+	+	/	/	/	+	/	+	/	+	+	+	+	c.573delC	p.S191RfsX13	R/I	/	Hartig MB.2006
																	c.573delC	p.S191RfsX13	R/I
PKAN154	F	3	>5.0	+	+	/	/	/	+	/	+	/	+	+	-	-	c.573delC	p.S191RfsX13	R/I	/	Hartig MB.2006
																	c.573delC	p.S191RfsX13	R/I
PKAN155	F	16	/	/	+	/	/	/	/	/	/	/	+	/	-	/	c.706_708delGAA	p.E236 Del	CCR	Persia	Habibi AH.2019
																	c.706_708delGAA	p.E236 Del	CCR
PKAN156	M	18	/	/	+	/	/	/	/	/	/	/	+	/	-	+	c.706_708delGAA	p.E236 Del	CCR	Persia	Habibi AH.2019
																	c.706_708delGAA	p.E236 Del	CCR
PKAN157	M	3	10	/	+	/	/	/	+	+	+	/	/	/	+	/	c.846_847delAG	p.S282SfsX3	CCR	Algerian	Assami S.2011
																	c.846_847delAG	p.S282SfsX3	CCR
PKAN158	F	3	11	/	+	/	/	/	+	+	+	/	/	/	+	/	c.846_847delAG	p.S282SfsX3	CCR	Algerian	Assami S.2011
																	c.846_847delAG	p.S282SfsX3	CCR
PKAN159	M	2	6	+	+	+	/	+	+	/	+	+	+	/	+	/	c.1017_1020delAGATins14	Truncated	CCR	Iran	Aryani O.2013
																	c.1017_1020delAGATins14	Truncated	CCR
PKAN160	M	2	6	+	+	+	/	+	+	/	+	/	+	-	/	/	c.1017_1020delAGAT	frameshift	CCR	Iran	Aryani O.2013
																	c.1017_1020delAGAT	frameshift	CCR
PKAN161	F	5	10	/	+	/	/	/	+	/	+	/	+	/	+	/	c.1171_1174dupAT	p.G392DfsX11	CCR	Algerian	Bower MA.2011
																	c.1171_1174dupAT	p.G392DfsX11	CCR
PKAN162	F	8	12	/	+	-	-	-	+	/	+	/	-	-	+	/	c.1171_1174dupAT	p.G392DfsX11	CCR	Algerian	Bower MA.2011
																	c.1171_1174dupAT	p.G392DfsX11	CCR
PKAN163	M	3	12	/	+	/	/	/	-	/	+	/	+	+	+	/	c.1171_1174dupAT	p.G392DfsX11	CCR	Algerian	Bower MA.2011
																	c.1171_1174dupAT	p.G392DfsX11	CCR
PKAN164	F	3	/	/	+	/	/	/	-	/	-	/	+	+	+	/	c.1171_1174dupAT	p.G392DfsX11	CCR	Algerian	Bower MA.2011
																	c.1171_1174dupAT	p.G392DfsX11	CCR
PKAN165	F	3	6	+	+	/	+	/	+	/	+	/	+	+	+	+	c.1323_1326del	p.D442AfsX7	CCR	/	Hartig MB.2006
																	c.1323_1326del	p.D442AfsX7	CCR
PKAN166	F	5	9	+	+	/	/	/	+	/	+	/	+	+	+	+	c.1323_1326del	p.D442AfsX7	CCR	/	Hartig MB.2006
																	c.1323_1326del	p.D442AfsX7	CCR
PKAN167	M	1	6	/	+	/	/	+	+	/	+	+	+	/	/	-	c.1325 1328delATAG	p.D442AfsX7	CCR	Turkey	Akcakaya NH.2017
																	c.1325 1328delATAG	p.D442AfsX7	CCR
PKAN168	M	18	/	+	+	/	+	/	+	-	-	/	+	-	-	+	c.1408insT	Truncated	CCR	China(TaiWan)	Lee CH.2013
																	c.1408insT	Truncated	CCR
PKAN169	F	4	Died at 9.0	/	+	/	/	/	+	/	/	/	+	-	/	/	c.1426_1429delATG	p.M476 fs	CCR	Iran	Dastsooz H.2017
																	c.1426_1429delATG	p.M476 fs	CCR
PKAN170	F	12	22	+	+	+	/	/	/	/	/	+	+	/	-	/	c.1442_1444delGAG	p.T528M	CCR	Dutch	Rump P.2005
																	c.1442_1444delGAG	p.T528M	CCR
PKAN171	M	5	10	+	+	+	/	/	/	/	/	-	+	/	+	/	c.1442_1444delGAG	p.T528M	CCR	Dutch	Rump P.2005
																	c.1442_1444delGAG	p.T528M	CCR
PKAN172	F	10	18	+	+	+	/	/	/	/	/	-	+	/	+	/	c.1442_1444delGAG	p.T528M	CCR	Dutch	Rump P.2005
																	c.1442_1444delGAG	p.T528M	CCR
PKAN173	F	4	/	+	/	+	/	/	/	+	/	/	+	+	/	/	c.1470delC	p.R490fs494X	CCR	China	This study
																	c.1470delC	p.R490fs494X	CCR
PKAN174	F	1	6	+	+	/	/	/	/	/	+	/	+	+	/	-	del exon 3+4	Truncated	CCR	/	Hartig MB.2006
																	del exon 3+4	Truncated	CCR
PKAN175	F	1	5	/	+	/	/	/	/	/	+	/	+	+	-	-	del exon 3+4	Truncated	CCR	/	Hartig MB.2006
																	del exon 3+4	Truncated	CCR
Hetrozygous indel/frameshift (37)
PKAN176	F	6.9	9.6	/	+	/	/	/	/	/	/	/	+	/	/	/	c.391_418del28	p.A131PfsX65	R/I	Korea	Lim BC.2011
																	c.1319G>C	p.R440P	CCR
PKAN177	M	9.8	11.1	+	+	/	/	/	/	/	/	/	+	/	/	/	c.391_418del28	p.A131PfsX65	R/I	Korea	Lim BC.2011
																	c.1319G>C	p.R440P	CCR
PKAN178	M	25	/	+	+	-	/	/	+	/	/	-	+	/	/	/	c.405dupC	p.H136PfsX45	R/I	China	Cheng Y.2018
																	c.1133A>G	p.D378G	CCR
PKAN179	M	18	/	/	+	/	/	/	+	-	/	/	+	/	/	/	c.464_465insC		R/I	/	Hartig MB.20067
																	c.1193C>T	p.A398V	CCR
PKAN180	M	11	/	/	+	/	/	/	/	/	/	/	+	+	/	/	c.510_522del	p.A170fs	R/I	China	Yang, et al. 2020
																	c.1319G> C	p.R440P	CCR
PKAN181	M	4	/	/	/	/	/	/	/	/	/	/	+	/	/	/	c.510_522del	p.A170fs	R/I	China	Yang, et al. 2020
																	c.1319G> C	p.R440P	CCR
PKAN182	M	<9	16	+	+	-	/	/	+	+	+	/	+	/	/	/	c.515_527del13	p.Val172GlyfsX29	R/I	/	Hájek .2005
																	c.1583C>T	p.T528M	CCR
PKAN183	F	<9	/	+	+	+	+	/	+	+	/	/	+	/	/	/	c.515_527del13	p.Val172GlyfsX29	R/I	/	Hájek .2005
																	c.1583C>T	p.T528M	CCR
PKAN184	M	4	>11.0	+	+	/	/	/	+	/	+	/	+	+	+	+	c.573delC	p.S191RfsX13	R/I	/	Hartig MB.2006
																	c.1274T>C	p.L425P	CCR
PKAN185	M	7	10	+	+	/	/	/	/	/	+	/	+	+	-	+	c.573delC	p.S191RfsX13	R/I	/	Hartig MB.2006
																	c.1583C>T	p.T528M	CCR
PKAN186	F	1	>5.0	+	+	/	/	/	/	/	+	/	+	+	-	+	c.821_822del	p.T274fs	CCR	/	Hartig MB.2006
																	del exon 1–4	Truncated	TPM
PKAN187	F	2	>6.0	/	+	/	/	/	+	/	+	/	+	+	/	-	c.821_822del	p.T274fs	CCR	/	Hartig MB.2006
																	c.1561G>A	p.G521R	CCR
PKAN188	F	5	32	/	+	/	/	/	+	/	+	/	+	+	+	/	c.850 851del	p.fs284X	CCR	Italy	Pellecchia MT.2005
																	c.791G>A	p.R264Q	CCR
PKAN189	F	0.33	/	/	+	/	/	/	-	+	/	/	/	-	+	-	c.943_945del	Truncated	CCR	/	Thomas M.2002
																	c.1561G>A	p.G521R	CCR
PKAN190	F	4	8	/	+	/	/	/	+	/	-	/	+	-	/	-	c.894G>A	p.M298I	CCR	/	Hartig MB.2006
																	c.1418_1424del	p.N474X	CCR
PKAN191		14.9	/	/	+	/	/	/	/	/	/	/	/	/	/	/	c.1003A>G	p.K335E	CCR	Korea	Lim BC.2011
																	c.1273_1275delCTT	p.L425del	CCR
PKAN192	M	15	/	/	+	/	/	/	+	+	-	/	+	+	/	-	c.1003A>G	p.K335E	CCR	Korea	Lee JH.2016
																	c.1270_1272del	p.L424del	CCR
PKAN193	M	15	/	/	+	/	/	/	+	-	-	/	+	-	/	-	c.1003A>G	p.K335E	CCR	Korea	Lee JH.2016
																	c.1270_1272del	p.L424del	CCR
PKAN194		18.9	/	/	+	/	/	/	/	/	/	/	/	/	/	/	c.1133A>G	p.D378G	CCR	Korea	Lim BC.2011
																	c.1273_1275delCTT	p.L425del	CCR
PKAN195	M	42	/	/	+	/	/	/	-	-	-	/	+	-	/	-	c.1133A>G	p.D378G	CCR	Korea	Lee JH.2016
																	c.1273_1275del	p.L425del	CCR
PKAN196	F	18	/	/	+	/	/	/	+	/	/	/	+	/	/	/	c.1148A>G	p.Y383C	CCR	India	Aggarwal A.2010
																	c.749delA	Truncated	CCR
PKAN197		25	/	/	+	/	/	/	/	/	/	/	/	/	/	/	c.1153delCinsTT	p.L385FfsX10	CCR	Korea	Lim BC.2011
																	c.1319G>C	p.R440P	CCR
PKAN198	F	6	/	/	+	/	/	/	+	+	+	/	+	-	+	/	c.1171_1174dupAT	p.G392DfsX11	CCR	Algerian	Bower MA.2011
																	c.519C>G	p.P173P	R/I
PKAN199	M	6	11	/	+	/	/	/	+	/	+	/	+	-	+	/	c.1171_1174dupAT	p.G392DfsX11	CCR	Algerian	Bower MA.2011
																	c.519C>G	p.P173P	R/I
PKAN200	F	12	30	+	+	/	/	/	/	/	+	/	+	+	+	+	c.1176_1177del	p.V394X	CCR	/	Hartig MB.2006
																	c.791G>A	p.R264Q	CCR
PKAN201	M	18	/	+	+	-	-	-	+	/	/	/	+	/	/	/	c.1193C>T	p.A398V	CCR	China	Ma LY. 2015
																	c.464_465insC	p.E156fs180X	R/I
PKAN192	M	35	/	+	+	/	+	/	/	/	-	/	+	/	/	+	c.1319G>C	p.R440P	CCR	/	Seo JH.2009
																	c.1133A>G	p.D378G	CCR
																	c.1154_1155insT	Truncated	CCR
PKAN203		9.3	/	+	+	/	/	/	/	/	/	/	+	/	/	/	c.1319G>C	p.R440P	CCR	Korea	Lim BC.2011
																	c.629-?_1412+_?del	Truncated	CCR
PKAN204	F	6	/	/	+	/	/	/	-	+	/	/	/	-	+	+	c.1561G>A	p.G521R	CCR	Italy	Kruer MC.2011
																	del exon1	Truncated	TPM
PKAN205	M	20	/	/	+	/	/	/	/	/	/	/	+	/	/	/	c.1273-1275del	p.L425del	CCR	/	Lyoo CP.2007
																	c.1563A>G	p.G521G	CCR
PKAN206	F	13	>27.0	/	+	/	/	/	/	/	-	/	+	+	-	-	c.1418_1424del	p.N474X	CCR	/	Hartig MB.2006
																	c.1583C>T	p.T528M	CCR
PKAN207	M	2	2	+	+	/	/	/	/	/	-	/	+	+	-	-	c.1442_1444del	p.R481_E482delinsQ	CCR	/	Hartig MB.2006
																	c.1583C>T	p.T528M	CCR
PKAN208	F	2	4	+	+	/	/	/	+	/	+	/	+	+	+	+	c.1561G>A	p.G521R	CCR	/	Hartig MB.2006
																	c.573delC	p.S191RfsX13	R/I
PKAN209	F	2	5	+	+	/	/	/	+	/	+	/	+	+	+	+	c.1561G>A	p.G521R	CCR	/	Hartig MB.2006
																	c.573delC	p.S191RfsX13	R/I
PKAN210	M	11	/	/	+	/	/	/	+	-	/	/	+	+	-	+	c.1696C>G	p.L566V	CCR	China	Zhang YY.2018
																	c.1160-1161insG	Truncated	CCR
PKAN211	F	6	9	+	+	/	/	/	/	/	+	/	+	+	+	+	c.1561G>A	p.G521R	CCR	/	Hartig MB.2006
																	c.1632dupG	p.Q545AfsX21	CCR
PKAN212	F	6	8	+	+	+	/	/	/	/	/	-	+	/	+	/	c.1442_1444delGAG	p.T528M	CCR	Dutch	Rump P.2005
																	c.533C>A	p.S178X	R/I
Homozygous splicing site mutations (9)
PKAN213	F	1	7	/	+	/	/	/	+	+	-	/	+	-	/	/	c.108+3A>G	Splicing site	TPM	China	Zhou J.2017
																	c.108+3A>G	Splicing site	TPM
PKAN214	M	1	5	/	+	/	/	+	+	/	+	+	+	/	/	+	c.628+2T>G	Splicing site	R/I	Turkey	Akcakaya NH.2017
																	c.628+2T>G	Splicing site	R/I
PKAN215	F	1	4	/	+	/	/	/	+	/	+	+	+	/	/	+	c.628+2T>G	Splicing site	R/I	Turkey	Akcakaya NH.2017
																	c.628+2T>G	Splicing site	R/I
PKAN216	M	1	8	/	+	/	/	+	+	/	+	-	+	/	/	-	c.628+2T>G	Splicing site	R/I	Turkey	Akcakaya NH.2017
																	c.628+2T>G	Splicing site	R/I
PKAN217	M	3	10	+	+	-	/	/	+	+	/	+	+	/	+	-	c.628+2T>G	Splicing site	R/I	/	Tanrıkulu B.2015
																	c.628+2T>G	Splicing site	R/I
PKAN218	F	1	7	+	+	+	/	/	+	/	+	-	+	/	/	/	c.982-1G>C	Splicing site	CCR	Thailand	Sakpichaisakul K.2019
																	c.982-1G>C	Splicing site	CCR
PKAN219	M	1	9	+	+	+	/	/	+	/	+	-	+	/	+	/	c.982-1G>C	Splicing site	CCR	Thailand	Sakpichaisakul K.2019
																	c.982-1G>C	Splicing site	CCR
PKAN220	M	2	4	+	+	+	/	/	+	/	+	-	/	/	-	/	c.982-1G>C	Splicing site	CCR	Thailand	Sakpichaisakul K.2019
																	c.982-1G>C	Splicing site	CCR
PKAN221	F	1	/	/	+	/	/	/	+	/	+	+	+	/	/	+	c.1537-2A>G	Splicing site	CCR	Turkey	Akcakaya NH.2017
																	c.1537-2A>G	Splicing site	CCR
Hetrozygous splicing site mutations (11)
PKAN222	F	15	/	/	+	/	/	/	+	+	/	/	+	-	-	/	c.258T>C	Splicing site	R/I	/	Zhu J.2011
																	IVS1-2A>T	p.F86F	R/I
PKAN223	M	8	/	/	+	/	/	/	+	-	/	/	+	-	-	/	c.258T>C	Splicing site	R/I	/	Zhu J.2011
																	IVS1-2A>T	p.F86F	R/I
PKAN224	F	2	/	+	+	-	-	/	+	-	-	/	+	+	-	/	IVS1+5G>C	Splicing site	R/I	Italy	Pellecchia MT.2005
																	c.965A>G	p.E322G	CCR
PKAN225	F	16	/	+	+	/	/	/	+	+	/	/	+	/	+	/	c.1310A>G	p.M437T	CCR	England	Houlden H.2003
																	IVS4-1G>T	Splicing site	R/I
PKAN226	M	1	/	/	+	-	/	/	+	/	-	-	+	/	-	/	c.982-1G>C	Splicing site	CCR	Thailand	Sakpichaisakul K.2019
																	c.1583C>G	p.T528R	CCR
PKAN227	F	15	/	/	+	/	/	/	+	+	-	/	+	/	/	/	c.1130T>C	p.F377S	CCR	China	Shan JL.2013
																	IVS1-2A>T	Splicing site	R/I
PKAN228	M	8	/	/	+	/	/	/	+	/	-	/	+	/	-	/	c.1130T>C	p.F377S	CCR	China	Shan JL.2013
																	IVS1-2A>T	Splicing site	R/I
PKAN229	F	15	/	+	+	/	+	/	+	+	/	/	+	-	/	/	c.1130T>C	p.F377S	CCR	China	Shan JL.2013
																	c.629-2A>T	Splicing site	R/I
PKAN230	M	8	/	+	+	+	+	/	+	/	/	/	+	/	/	/	c.1130T>C	p.F377S	CCR	China	Shan JL.2013
																	c.629-2A>T	Splicing site	R/I
PKAN231	F	12	/	+	+	-	/	/	/	/	/	/	+	/	/	/	c.1583C>T	p.T528M	CCR	/	Hájek .2005
																	c.1235+5G>A	Splicing site	CCR
																	c.1413-14_1413-9dupTTCCCC	Truncated	CCR
PKAN232	M	3	>3.0	/	+	/	/	/	/	/	+	/	+	-	-	-	c.1663-1G>C	Splicing site	CCR	/	Hartig MB.2006
																	del exon 5	Truncated	CCR
Homozygous nosense (11)
PKAN233	F	2	/	/	+	/	/	/	-	-	+	/	+	-	-	/	c.53C>A	p.S18X	TPM	China	Chang XT.2020
																	c.53C>A	p.S18X	TPM
PKAN234	F	1.5	/	+	+	+	/	+	/	/	+	-	+	/	+	/	c.434C>A	p.S145X	R/I	Asian origin	Zolkipli Z.2006
																	c.434C>A	p.S145X	R/I
PKAN235	M	2.5	4.75	+	+	+	/	/	/	/	+	-	+	/	/	/	c.434C>A	p.S145X	R/I	Asian origin	Zolkipli Z.2006
																	c.434C>A	p.S145X	R/I
PKAN236	F	2	16	+	+	/	/	/	/	/	+	/	+	+	+	-	c.569dupA	p.Y190X	R/I	/	Hartig MB.2006
																	c.569dupA	p.Y190X	R/I
PKAN237	F	2	17	+	+	/	/	/	/	/	+	/	+	+	+	-	c.569dupA	p.Y190X	R/I	/	Hartig MB.2006
																	c.569dupA	p.Y190X	R/I
PKAN238	F	2	11	/	+	/	/	/	+	+	+	/	+	/	/	/	c.936T>A	p.C312X	R/I	Iran	Soudeh GF.2016
																	c.936T>A	p.C312X	R/I
PKAN239	F	1	/	/	+	/	/	/	-	-	-	/	-	-	/	/	c.936T>A	p.C312X	R/I	Iran	Soudeh GF.2016
																	c.936T>A	p.C312X	R/I
PKAN240	M	1	7	/	+	/	/	+	+	/	+	+	+	/	/	-	c.994C>T	p.Q332X	CCR	Turkey	Akcakaya NH.2017
																	c.994C>T	p.Q332X	CCR
PKAN241	M	1	8	/	+	/	/	/	+	/	+	+	+	/	/	-	c.994C>T	p.Q332X	CCR	Turkey	Akcakaya NH.2017
																	c.994C>T	p.Q332X	CCR
PKAN242	F	2	5	/	+	/	/	+	-	/	+	+	+	/	/	-	c.994C>T	p.Q332X	CCR	Turkey	Akcakaya NH.2017
																	c.994C>T	p.Q332X	CCR
PKAN243	F	3	7	+	+	/	/	/	+	/	+	/	+	+	-	+	c.994C>T	p.Q332X	CCR	/	Hartig MB.2006
																	c.994C>T	p.Q332X	CCR
Hetrozygous nosense (12)
PKAN244	F	24	/	/	+	/	/	/	+	-	-	/	+	/	/	/	c.988G>T	p.E330Y	CCR	China	Song XW.2009
																	c.1133A>G	p.D378G	CCR
PKAN245	F	9	11	/	+	/	/	/	+	/	-	/	+	+	+	/	c.445G>T	p.E149X	R/I	China	He J.2013
																	c.1270C>T	p.L424F	CCR
PKAN246	F	9	/	/	+	/	/	/	+	+	-	/	-	-	+	/	c.445G>T	p.E149X	R/I	China	Zhou J.2017
																	c.1270C>T	p.L424F	CCR
PKAN247	F	3	7	+	+	-	/	/	+	+	+	-	+	/	+	/	c.638G>A	p.W213X	CCR	Argentinean	Kanazawa K.2010
																	c.655G>A	p.G219S	CCR
PKAN248	F	2	/	/	+	+	-	/	+	-	+	/	+	-	-	/	c.1351C>T	p.R451X	CCR	Italy	Pellecchia MT.2005
																	c.1561G>A	p.G521R	CCR
PKAN249		12.9	/	/	+	/	+	/	/	/	/	/	/	/	/	/	c.1351C>T	p.R451X	CCR	Korea	Lim BC.2011
																	c.1607A>G	p.Y536C	CCR
PKAN250	M	18	21	+	+	/	/	/	/	/	+	/	+	-	-	+	c.1441C>T	p.R481X	CCR	/	Hartig MB.2006
																	c.966G>T	p.E322D	CCR
PKAN251	F	6	/	+	/	+	/	/	/	/	/	/	/	+	/	/	c.445G>T	p.E149X	R/I	China	This study
																	c.1133A>G	p.D378G	CCR
PKAN252	M	2	15	/	+	/	/	/	-	+	-	/	-	-	+	/	c.314G>A	p.W105X	R/I	China	He J.2013
																	c.856C>T	p.R286C	CCR
PKAN253	F	30	/	/	+	/	/	/	+	/	/	/	+	/	/	/	c.445G>T	p.E149X	R/I	China	Song XW.2009
																	c.1133A>G	p.D378G	CCR
PKAN254	M	28	/	/	+	-	+	/	/	/	/	-	+	/	/	+	c.445G>T	p.E149X	R/I	China	Mak CM.2011
																	c.1133A>G	p.D378G	CCR
PKAN255	M	30	50	+	+	/	/	/	+	/	+	/	+	+	+	-	c.775G>A	p.G259R	CCR	/	Hartig MB.2006
																	c.1441C>T	p.R481X	CCR
Total number of patients = 255; Total number of mutations = 158
F, Female; M, Male; CCR, catalytic core domain; R/I, intermediate/regulatory domain; TPM, transit peptide/mitochondrial domain; /, not available
